# Supplementary material for: Up-regulation of circARF3 reduces blood-brain barrier damage in rat subarachnoid hemorrhage model via miR-31-5p/MyD88/NF-κB axis
Source: publisher site journal article supplement (doi:10.18632/aging.203468), 2021-09-12
Supplement: Supplementary file [file aging-v13i17-203468-supplementary-material-SD1.pdf]

**SUPPLEMENTARY FIGURES**

**Experimental design drawing**

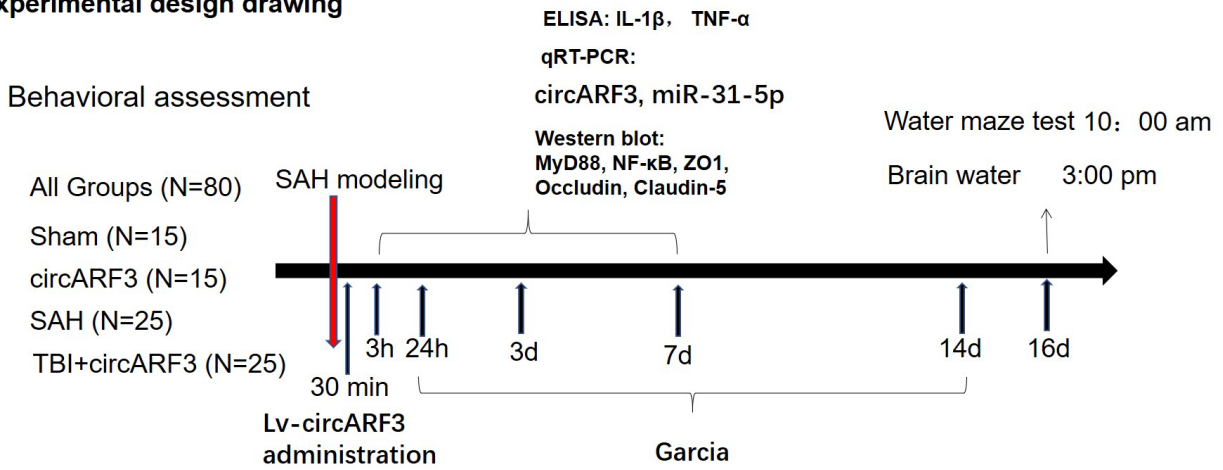

Supplementary Figure 1. The animal experiment procedures were shown.

**A**

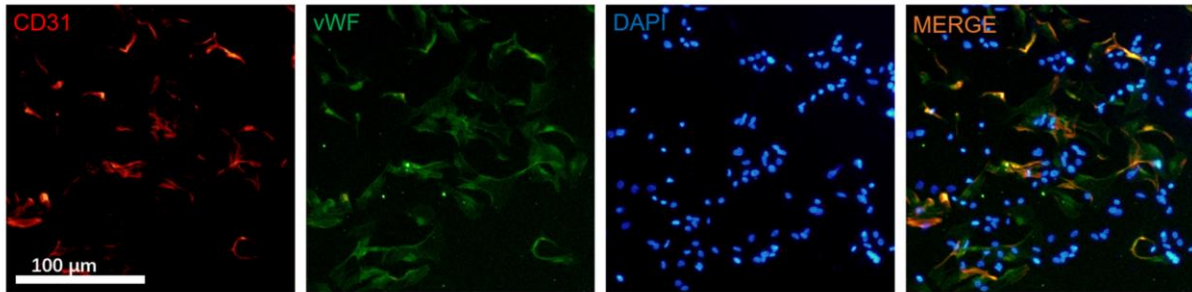

**B**

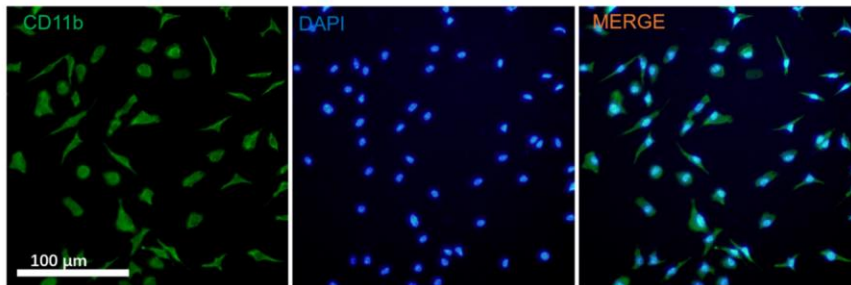

**Supplementary Figure 2.** (A) Cell immunofluorescence was used to identify primary BMECs labeled by CD31 (red) and vWF (green). (B) Cell immunofluorescence was used to identify microglia labeled by CD11b (green).
